# Supplementary material
Source: publisher site journal article supplement (https://www.dovepress.com/article/410477)
Supplement: Supplementary file 1 [file get_supplementary_file.php]

**Supplementary Table 1.** The correlations between OS, PFS, and various clinicopathological factors in all CRC patients

|  | Univariate analysis | | | | Multivariate analysis | | | |
| --- | --- | --- | --- | --- | --- | --- | --- | --- |
| OS | | PFS | | OS | | PFS | |
| HR(95 % CI) | p-value | HR(95 % CI) | p-value | HR(95 % CI) | p-value | HR(95 % CI) | p-value |
| Sex(female vs. male) | 0.657(0.377-1.144) | 0.138 | 0.758(0.473-1.216) | 0.251 |  |  |  |  |
| Age (≤60 vs. ＞60) | 1.486(0.887-2.491) | 0.133 | 1.163(0.744-1.819) | 0.508 |  |  |  |  |
| Location of the primary tumor (colon vs. rectum vs. rectum&colon) | 1.126(1.004-1.263) | **0.043** | 1.038(0.907-1.188) | 0.588 | 1.069(0.943-1.211) | 0.295 |  |  |
| Lymphatic invasion (ly 0 vs. ly1, 2, 3) | 3.677(1.862-7.263) | **<0.001** | 3.289(1.870-5.786) | **<0.001** | 2.207(1.078-4.518) | **0.030** | 2.371(1.311-4.288) | **0.04** |
| Pre-treatment CEA (≤5 ng/mL vs. >5 ng/mL) | 4.402(2.413-8.030) | **<0.001** | 2.814(1.753-4.518) | **<0.001** | 1.888(0.942-3.787) | 0.073 | 1.415(0.818-2.450) | 0.215 |
| Pretreatment CA19-9 (≤37 U/ml vs. >37 U/ml) | 5.471(3.275-9.138) | **<0.001** | 3.882(2.453-6.143) | **<0.001** | 2.546(1.393-4.655) | **0.002** | 1.963(1.143-3.371) | **0.015** |
| Pretreatment HSP90α(≤82ng/mL vs. >82 ng/mL) | 1.934(1.089-3.436) | **0.024** | 1.880(1.129-3.131) | **0.015** | 0.844(0.448-1.589) | 0.599 | 1.089(0.630-1.882) | 0.759 |
| Pretreatment AFP (≤8.78ng/mL vs. >8.78 ng/mL) | 0.049(0-4050.699) | 0.602 | 0.049(0-777.011) | 0.541 |  |  |  |  |
| Pretreatment CYFRA 21-1 (≤3.47ng/mL vs. >3.47 ng/mL) | 4.739(2.793-8.040) | **<0.001** | 3.873(2.467-6.080) | **<0.001** | 3.130(1.782-5.498) | **<0.001** | 2.952(1.838-4.742) | **<0.001** |

Bold values indicate statistical significance (p<0.05).


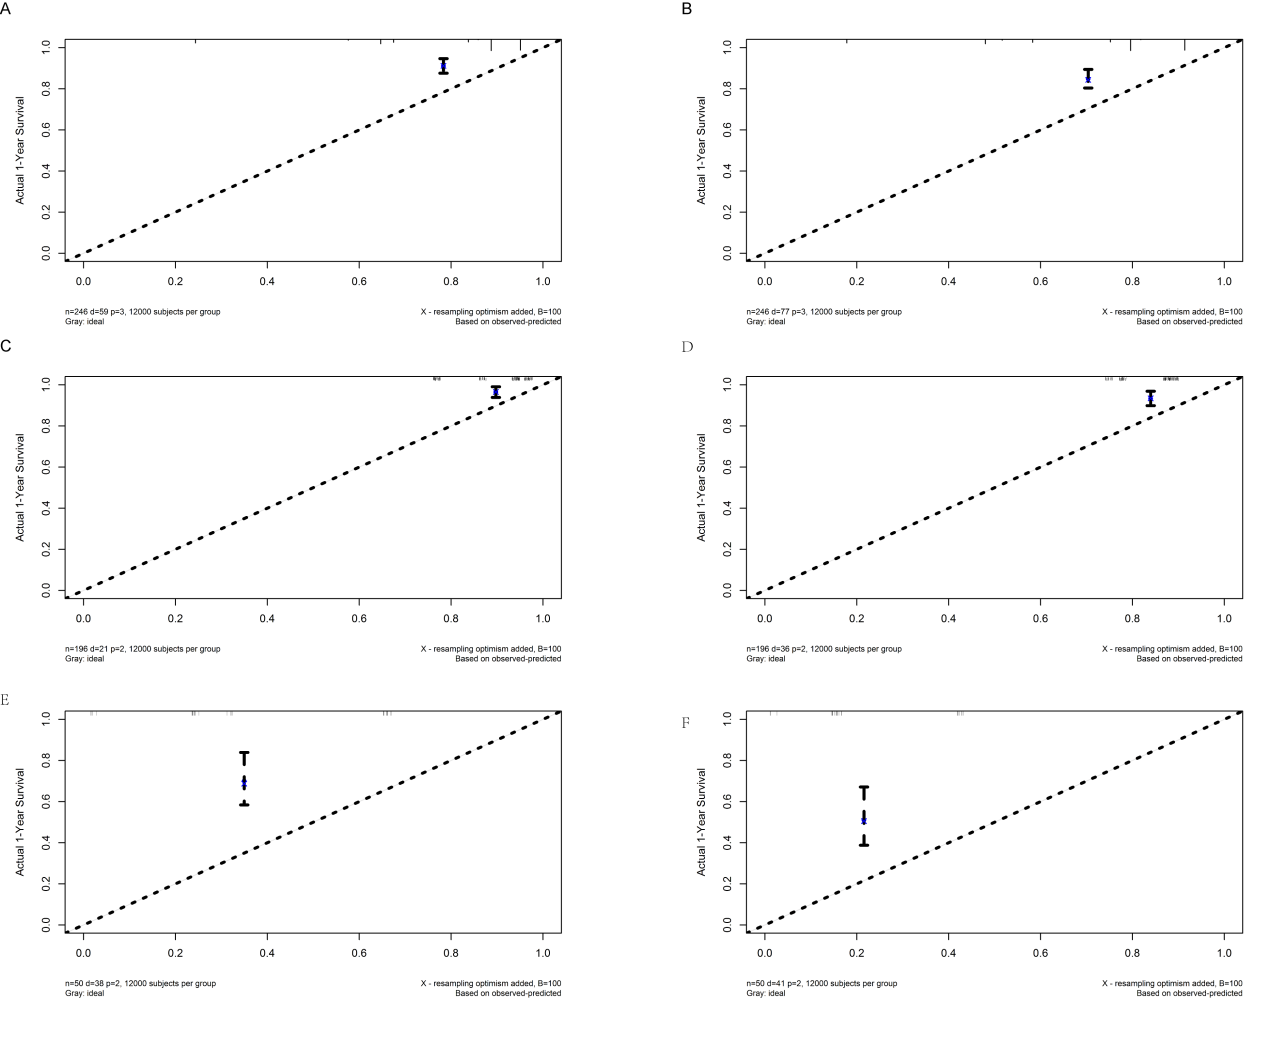


**Supplementary Figure 1.** Nomograms calibration chart for 1 year.(A) CRC OS; (B) CRC PFS; (C) stage I–III CRC OS; (D) stage I–III CRC PFS;(E) CRLM OS (F) CRLM PFS


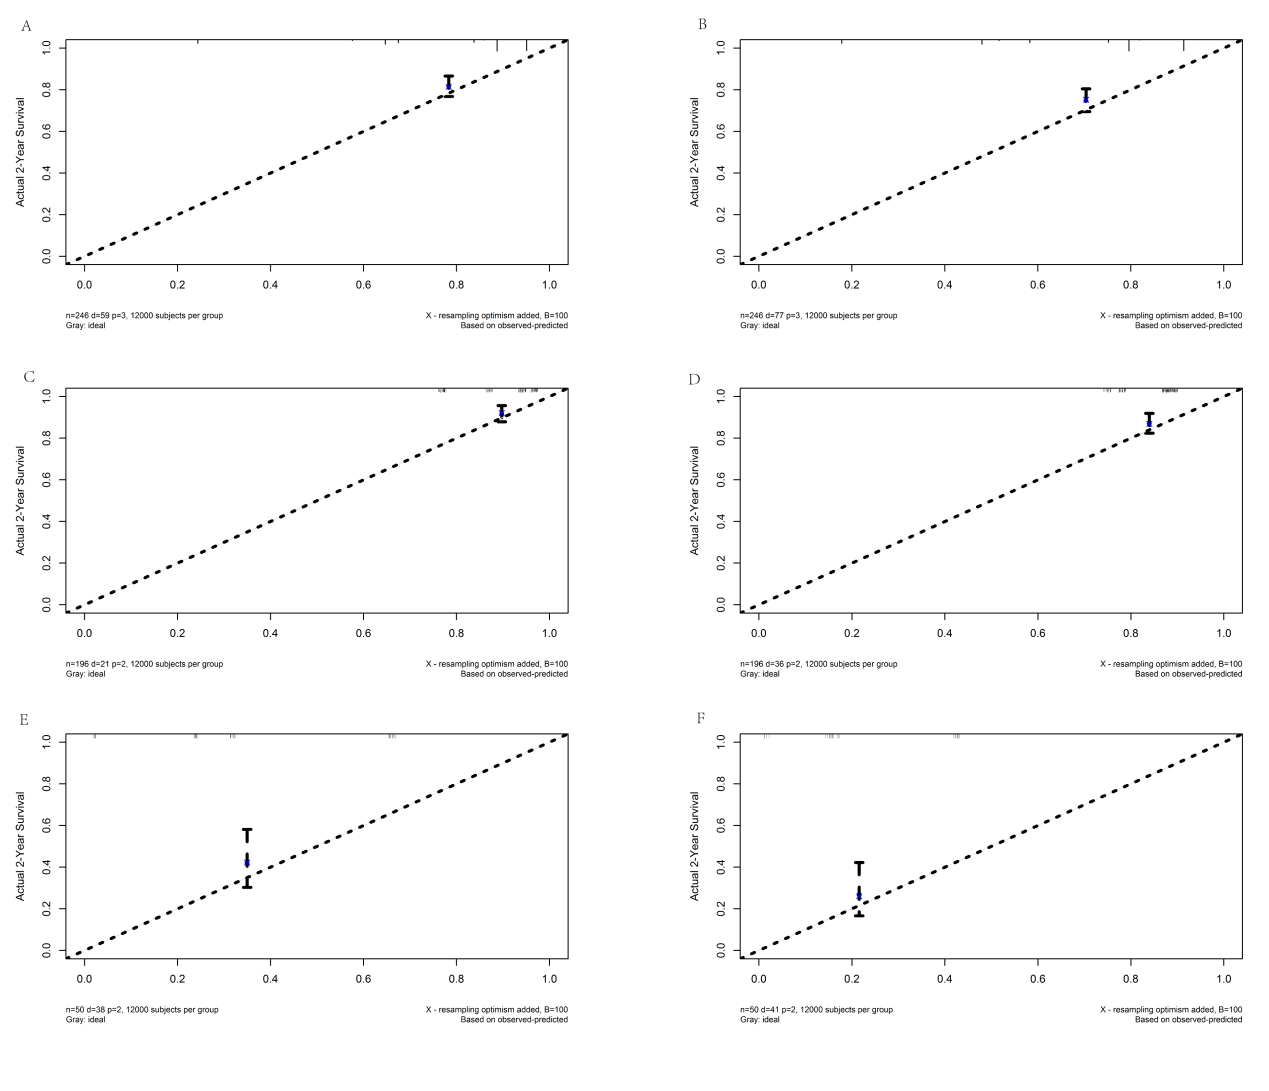


**Supplementary Figure 2.** Nomograms calibration chart for 2 year. (A) CRC OS; (B) CRC PFS; (C) stage I–III CRC OS; (D) stage I–III CRC PFS;(E) CRLM OS (F) CRLM PFS
